# Supplementary material for: Partitioning soil organic carbon into its centennially stable andactive fractions with statistical models based on Rock-Eval® thermalanalysis (PARTY SOC v2.0 and PARTY SOC v2.0 EU )
Source: Copernicus journal article supplement (doi:10.5194/gmd-2021-16), 2021-02-16
Supplement: Supplementary file 1 [file gmd-2021-16-supplement.zip]

Supplementary information to:

## **Partitioning soil organic carbon into its centennially active and stable fractions with statistical models based on Rock-Eval® thermal analysis (PARTY<sub>soC</sub>v2.0 and PARTY<sub>soC</sub>v2.0<sub>EU</sub>)**

Lauric Cécillon<sup>1,2</sup>, François Baudin<sup>3</sup>, Claire Chenu<sup>4</sup>, Bent T. Christensen<sup>5</sup>, Uwe Franko<sup>6</sup>, Sabine Houot<sup>4</sup>, Eva Kanari<sup>2,3</sup>, Thomas Kätterer<sup>7</sup>, Ines Merbach<sup>8</sup>, Folkert van Oort<sup>4</sup>, Christopher Poeplau<sup>9</sup>, Juan Carlos Quezada<sup>10,11,12</sup>, Florence Savignac<sup>3</sup>, Laure N. Soucémarianadin<sup>13</sup>, Pierre Barré<sup>2</sup>

<sup>1</sup>Laboratoire ECODIV, Univ. Normandie, UNIROUEN, INRAE, FR Scale CNRS 3730, Rouen, 76000, France

<sup>2</sup>Laboratoire de Géologie, CNRS, École normale supérieure, PSL University, IPSL, Paris, France

<sup>3</sup>Institut des Sciences de la Terre de Paris, Sorbonne Université, CNRS, Paris, 75005, France

<sup>4</sup>UMR 1402 ECOSYS, INRAE, AgroParisTech, Univ. Paris Saclay, Thiverval-Grignon, 78850, France

<sup>5</sup>Department of Agroecology, Aarhus University, AU Foulum, 8830 Tjele, Denmark

<sup>6</sup>Department of soil system science, Helmholtz Centre for Environmental Research, UFZ, 06120 Halle Germany

<sup>7</sup>Department of Ecology, Swedish University of Agricultural Sciences, 75007 Uppsala, Sweden

<sup>8</sup>Department Community Ecology, Helmholtz Centre for Environmental Research, UFZ, 06246 Bad Lauchstädt, Germany

<sup>9</sup>Thünen Institute of Climate-Smart Agriculture, 38116 Braunschweig, Germany

<sup>10</sup>Laboratory of Ecological Systems ECOS and Laboratory of Plant Ecology Research PERL, School of Architecture, Civil and Environmental Engineering ENAC, École Polytechnique Fédérale de Lausanne EPFL, 1015 Lausanne, Switzerland

<sup>11</sup>Swiss Federal Institute for Forest, Snow and Landscape Research WSL, 1015 Lausanne, Switzerland

<sup>12</sup>Ecosystem Management, Institute of Terrestrial Ecosystems, Department of Environmental Systems Science, ETHZ, 8092 Zürich, Switzerland

<sup>13</sup>ACTA – les instituts techniques agricoles, 75595 Paris, France

*Correspondence to:* Lauric Cécillon ([lauric.cecillon@inrae.fr](mailto:lauric.cecillon@inrae.fr))

**Table S1: Main changes between the first version of PARTY<sub>SOC</sub> and the second version of the model (PARTY<sub>SOC</sub>v2.0 and PARTY<sub>SOC</sub>v2.0<sub>EU</sub>).** Abbreviations: SOC, soil organic carbon; SOC<sub>EA</sub>, soil organic carbon content determined by elemental analysis; TOC<sub>RE6</sub>, soil organic carbon content determined by Rock-Eval® thermal analysis; MinC, soil inorganic carbon content determined by Rock-Eval® thermal analysis; LTBF, long-term bare fallow.

|                                                                                                                   | <b>First version of<br/>PARTY<sub>SOC</sub></b><br>(Cécillon et al., 2018)                                                                                                  | <b>PARTY<sub>SOC</sub>v2.0</b><br>(This study)                                                                                                                                                                                                                                                                                              | <b>PARTY<sub>SOC</sub>v2.0<sub>EU</sub></b><br>(This study)                                                                                                                                                                                                                                           |
|-------------------------------------------------------------------------------------------------------------------|-----------------------------------------------------------------------------------------------------------------------------------------------------------------------------|---------------------------------------------------------------------------------------------------------------------------------------------------------------------------------------------------------------------------------------------------------------------------------------------------------------------------------------------|-------------------------------------------------------------------------------------------------------------------------------------------------------------------------------------------------------------------------------------------------------------------------------------------------------|
| <b>Number of<br/>reference sites</b>                                                                              | 4                                                                                                                                                                           | 7                                                                                                                                                                                                                                                                                                                                           | 6                                                                                                                                                                                                                                                                                                     |
| <b>Method to estimate<br/>the centennially<br/>stable SOC content<br/>at the reference<br/>sites</b>              | Exclusively inferred from plant-free LTBF treatments; and calculated exclusively by modelling the decline with time of SOC initially present at the onset of the experiment | Inferred from plant-free LTBF treatments (6 sites) and from one vegetated site (La Cabaña); and estimated by modelling the decline with time of SOC initially present at the onset of the experiment, or by using a measured value of SOC content or C <sub>4</sub> -plant derived SOC that is lower than the parameter <i>c</i> of Eq. (1) | Exclusively inferred from plant-free LTBF treatments; and estimated by modelling the decline with time of SOC initially present at the onset of the experiment, or by using a measured value of SOC content or C <sub>4</sub> -plant derived SOC that is lower than the parameter <i>c</i> of Eq. (1) |
| <b>Method to estimate<br/>the centennially<br/>stable SOC<br/>proportion in<br/>reference topsoil<br/>samples</b> | By dividing the site-specific content of the centennially stable SOC content by the SOC <sub>EA</sub> content of topsoil samples                                            | By dividing the site-specific content of the centennially stable SOC content by the TOC <sub>RE6</sub> or the TOC <sub>RE6</sub> +MinC content of topsoil samples                                                                                                                                                                           | By dividing the site-specific content of the centennially stable SOC content by the TOC <sub>RE6</sub> or the TOC <sub>RE6</sub> +MinC content of topsoil samples                                                                                                                                     |
| <b>Number of<br/>reference topsoil<br/>samples (per site)</b>                                                     | 118<br>(unequal number of samples per site)                                                                                                                                 | 105<br>(15 samples per reference site)                                                                                                                                                                                                                                                                                                      | 90<br>(15 samples per reference site)                                                                                                                                                                                                                                                                 |
| <b>Rock-Eval®<br/>predictor variables</b>                                                                         | 30, not directly related to SOC content, not necessarily correlated to the proportion of the centennially stable SOC fraction                                               | 18, some of them are directly related to SOC content, all are highly correlated to the proportion of the centennially stable SOC fraction (Spearman's rho > 0.5)                                                                                                                                                                            | 18, some of them are directly related to SOC content, all are highly correlated to the proportion of the centennially stable SOC fraction (Spearman's rho > 0.5)                                                                                                                                      |
| <b>Criteria regarding<br/>the inclusion of<br/>topsoils in the</b>                                                | None (all available reference topsoil samples are used)                                                                                                                     | Exclusion of reference topsoil samples (1) from treatments experiencing repeated                                                                                                                                                                                                                                                            | Exclusion of reference topsoil samples (1) from treatments experiencing repeated                                                                                                                                                                                                                      |

|                                                                        |                                                                                                       |                                                                                                                                                                                                                                                                                                                                |                                                                                                                                                                                                                                                                                                                   |
|------------------------------------------------------------------------|-------------------------------------------------------------------------------------------------------|--------------------------------------------------------------------------------------------------------------------------------------------------------------------------------------------------------------------------------------------------------------------------------------------------------------------------------|-------------------------------------------------------------------------------------------------------------------------------------------------------------------------------------------------------------------------------------------------------------------------------------------------------------------|
| <b>reference sample set<br/>of the model</b>                           |                                                                                                       | applications of compost or manure; (2) having an organic carbon yield of Rock-Eval® analysis below 86% or above 116%. Then, selection of 15 reference topsoil samples per site (1) enhancing the range of the centennially stable SOC proportion at that site; (2) having the best organic carbon yield of Rock-Eval® analysis | applications of compost or manure; (2) having an organic carbon yield of Rock-Eval® analysis below 86% or above 116%. Then, selection of 15 reference topsoil samples per site (1) enhancing the range of the centennially stable SOC proportion; (2) having the best organic carbon yield of Rock-Eval® analysis |
| <b>Validation<br/>procedure for the<br/>machine learning<br/>model</b> | Mostly “random splitting” procedure, “leave-one-site-out” procedure tested only for one site (Ultuna) | Fully independent “leave-one-site-out” procedure                                                                                                                                                                                                                                                                               | Fully independent “leave-one-site-out” procedure                                                                                                                                                                                                                                                                  |

**Table S2: Basic characteristics of the seven reference sites used for the learning set of the statistical model PARTY<sub>SOC</sub>v2.0, and site-specific values of the parameter *c* in Eq. (1).** Most data are taken from Barré et al. (2010), Cécillon et al. (2018), Franko and Merbach (2017) and Quezada et al. (2019). Abbreviations: SFE, static fertilization experiment (V120); FE, fallow experiment (V505a).

| Site,<br>Country                  | Latitude, longitude<br>[° min s]                                    | Mean<br>annual<br>temperature<br>[°C] | Mean annual<br>precipitation<br>[mm] | Soil type<br>[WRB; FAO, 2014] | Land use<br>before<br>experiment | Sampling<br>depth<br>[cm] | pH<br>(in H <sub>2</sub> O) | Soil texture<br>[%]<br>(clay/silt/sand) | Parameter <i>c</i><br>in Eq. (1)<br>(g C kg <sup>-1</sup> ) |
|-----------------------------------|---------------------------------------------------------------------|---------------------------------------|--------------------------------------|-------------------------------|----------------------------------|---------------------------|-----------------------------|-----------------------------------------|-------------------------------------------------------------|
| <b>Versailles,</b><br>France      | 48°48'12.76"N; 2°05'09.95"E                                         | 10.7                                  | 628                                  | Haplic Luvisol                | grassland                        | 0–25                      | 5.6 to 6.4                  | 17/57/26                                | 6.22                                                        |
| <b>Rothamsted,</b><br>England     | 51°48'14.12"N; 0°21'41.39"E                                         | 9.5                                   | 712                                  | Chromic Luvisol               | grassland                        | 0–23                      | 5.2 to 6.3                  | 25/62/13                                | 10.46                                                       |
| <b>Ultuna,</b><br>Sweden          | 59°48'46.00"N; 17°39'01.75"E                                        | 5.5                                   | 533                                  | Eutric Cambisol               | arable                           | 0–20                      | 6.6                         | 36/41/23                                | 6.95                                                        |
| <b>Grignon,</b><br>France         | 48°51'01.35"N; 1°57'03.55"E                                         | 10.7                                  | 649                                  | Calcaric Cambisol             | grassland                        | 0–25                      | 8.0 to 8.3                  | 16/54/30                                | 7.12                                                        |
| <b>Askov,</b><br>Denmark          | B3 55°28'12.89"N; 9°06'41.77"E<br>B4 55°28'19.19"N; 9°07'00.02"E    | 7.8                                   | 862                                  | Arenic Luvisol                | arable                           | 0–20                      | 5.5 to 6.5                  | 10/11/79                                | 5.10                                                        |
| <b>Bad Lauchstädt,</b><br>Germany | SFE 51°23'24.34"N; 11°52'48.48"E<br>FE 51°23'34.75"N; 11°52'39.61"E | 8.9                                   | 484                                  | Haplic Chernozem              | arable                           | 0–20 (SFE)<br>0–30 (FE)   | 6.9 to 7.4                  | 21/68/11                                | 16.22                                                       |
| <b>La Cabaña,</b><br>Colombia     | 4°16'N; 73°22'W                                                     | 27                                    | 3400                                 | Dystric Cambisol              | grassland                        | 0–10                      | 4.0 to 4.6                  | 30/34/36                                | 5.12                                                        |

**Table S3: List of the 105 reference topsoil samples retained as the learning set of PARTY<sub>SOC</sub>v2.0, including information on their reference site, land cover, agronomical treatment, sampling year and values for the 40 Rock-Eval® parameters considered in this study.** See the Section 2.2 for a description of the 40 Rock-Eval® parameters and their units. Supplementary Table S3 is provided as a separate csv file.

**Table S4: Basic statistics of the 40 Rock-Eval® parameters, calculated on the 105 reference topsoil samples of the learning set of the PARTY<sub>SOC</sub>v2.0 statistical model.** See the Section 2.2 for a description of the 40 Rock-Eval® parameters. The 18 Rock-Eval® parameters retained as predictor variables for the second version of PARTY<sub>SOC</sub> are shown in bold.

| Rock-Eval® parameter (unit)  |            | Mean       | Median     | Minimum    | Maximum    | Standard deviation |
|------------------------------|------------|------------|------------|------------|------------|--------------------|
| T10 <sub>HC_PYR</sub>        | (°C)       | 310        | 309        | 279        | 343        | 16                 |
| T30 <sub>HC_PYR</sub>        | (°C)       | 372        | 372        | 330        | 402        | 15                 |
| T50 <sub>HC_PYR</sub>        | (°C)       | 422        | 421        | 389        | 445        | 12                 |
| <b>T70<sub>HC_PYR</sub></b>  | (°C)       | <b>465</b> | <b>462</b> | <b>446</b> | <b>484</b> | <b>10</b>          |
| <b>T90<sub>HC_PYR</sub></b>  | (°C)       | <b>523</b> | <b>522</b> | <b>495</b> | <b>547</b> | <b>15</b>          |
| T10 <sub>CO_PYR</sub>        | (°C)       | 307        | 305        | 295        | 318        | 5                  |
| T30 <sub>CO_PYR</sub>        | (°C)       | 358        | 357        | 346        | 373        | 6                  |
| T50 <sub>CO_PYR</sub>        | (°C)       | 405        | 403        | 391        | 423        | 7                  |
| T70 <sub>CO_PYR</sub>        | (°C)       | 460        | 458        | 451        | 477        | 7                  |
| T90 <sub>CO_PYR</sub>        | (°C)       | 525        | 524        | 519        | 539        | 4                  |
| T10 <sub>CO2_PYR</sub>       | (°C)       | 286        | 284        | 276        | 300        | 7                  |
| <b>T30<sub>CO2_PYR</sub></b> | (°C)       | <b>343</b> | <b>339</b> | <b>329</b> | <b>365</b> | <b>10</b>          |
| <b>T50<sub>CO2_PYR</sub></b> | (°C)       | <b>392</b> | <b>387</b> | <b>375</b> | <b>419</b> | <b>13</b>          |
| <b>T70<sub>CO2_PYR</sub></b> | (°C)       | <b>445</b> | <b>441</b> | <b>427</b> | <b>469</b> | <b>13</b>          |
| <b>T90<sub>CO2_PYR</sub></b> | (°C)       | <b>511</b> | <b>510</b> | <b>497</b> | <b>526</b> | <b>8</b>           |
| T10 <sub>CO_OX</sub>         | (°C)       | 323        | 317        | 299        | 383        | 16                 |
| T30 <sub>CO_OX</sub>         | (°C)       | 374        | 364        | 331        | 495        | 32                 |
| T50 <sub>CO_OX</sub>         | (°C)       | 421        | 400        | 366        | 578        | 46                 |
| <b>T70<sub>CO_OX</sub></b>   | (°C)       | <b>481</b> | <b>464</b> | <b>404</b> | <b>671</b> | <b>52</b>          |
| T90 <sub>CO_OX</sub>         | (°C)       | 568        | 547        | 477        | 776        | 64                 |
| T10 <sub>CO2_OX</sub>        | (°C)       | 327        | 326        | 318        | 358        | 6                  |
| T30 <sub>CO2_OX</sub>        | (°C)       | 375        | 374        | 363        | 405        | 8                  |
| <b>T50<sub>CO2_OX</sub></b>  | (°C)       | <b>417</b> | <b>413</b> | <b>398</b> | <b>455</b> | <b>14</b>          |
| <b>T70<sub>CO2_OX</sub></b>  | (°C)       | <b>469</b> | <b>465</b> | <b>437</b> | <b>509</b> | <b>19</b>          |
| <b>T90<sub>CO2_OX</sub></b>  | (°C)       | <b>540</b> | <b>538</b> | <b>511</b> | <b>568</b> | <b>12</b>          |
| I-index                      | (unitless) | 0.18       | 0.17       | 0.02       | 0.37       | 0.08               |
| R-index                      | (unitless) | 0.59       | 0.59       | 0.47       | 0.70       | 0.05               |

|                             |                                              |             |             |             |             |             |
|-----------------------------|----------------------------------------------|-------------|-------------|-------------|-------------|-------------|
| TLHC-index                  | (unitless)                                   | 0.63        | 0.64        | 0.53        | 0.72        | 0.05        |
| <b>HI</b>                   | <b>(mg HC g<sup>-1</sup> C)</b>              | <b>156</b>  | <b>143</b>  | <b>69</b>   | <b>284</b>  | <b>58</b>   |
| OI <sub>RE6</sub>           | (mg O <sub>2</sub> g <sup>-1</sup> C)        | 183         | 184         | 146         | 246         | 21          |
| <b>TOC<sub>RE6</sub></b>    | <b>(g C kg<sup>-1</sup>)</b>                 | <b>16.0</b> | <b>14.3</b> | <b>5.6</b>  | <b>41.5</b> | <b>7.3</b>  |
| MinC                        | (g C kg <sup>-1</sup> )                      | 2.7         | 1.7         | 0.6         | 12.5        | 2.8         |
| <b>PC</b>                   | <b>(g C kg<sup>-1</sup>)</b>                 | <b>3.7</b>  | <b>3</b>    | <b>1.1</b>  | <b>11</b>   | <b>2.2</b>  |
| <b>S2</b>                   | <b>(g C kg<sup>-1</sup>)</b>                 | <b>2.2</b>  | <b>1.7</b>  | <b>0.6</b>  | <b>7.4</b>  | <b>1.6</b>  |
| <b>PseudoS1</b>             | <b>(g C kg<sup>-1</sup>)</b>                 | <b>0.12</b> | <b>0.09</b> | <b>0.05</b> | <b>0.51</b> | <b>0.07</b> |
| PseudoS1/PC                 | (unitless)                                   | 0.04        | 0.03        | 0.02        | 0.11        | 0.02        |
| PseudoS1/TOC <sub>RE6</sub> | (unitless)                                   | 0.008       | 0.007       | 0.003       | 0.023       | 0.004       |
| <b>S2/PC</b>                | <b>(unitless)</b>                            | <b>0.56</b> | <b>0.54</b> | <b>0.42</b> | <b>0.76</b> | <b>0.09</b> |
| <b>PC/TOC<sub>RE6</sub></b> | <b>(unitless)</b>                            | <b>0.22</b> | <b>0.22</b> | <b>0.14</b> | <b>0.32</b> | <b>0.05</b> |
| <b>HI/OI<sub>RE6</sub></b>  | <b>(mg HC mg<sup>-1</sup> O<sub>2</sub>)</b> | <b>0.87</b> | <b>0.74</b> | <b>0.43</b> | <b>1.92</b> | <b>0.39</b> |

---

**Table S5: Sensitivity of model performance to the reference sites included in the learning set, using 15 topsoil samples from the sites of Grignon (a) or Versailles (b) as test sets.** Site-specific performance statistics are calculated on a test set made of topsoil samples from Grignon or Versailles. Abbreviations are defined in Section 2.5.

| <b>a</b>                               | <b>Grignon topsoil samples used as test set (n = 15)</b>                   |                                                                                         |                                                                          |                                                              |                                                  |
|----------------------------------------|----------------------------------------------------------------------------|-----------------------------------------------------------------------------------------|--------------------------------------------------------------------------|--------------------------------------------------------------|--------------------------------------------------|
| <b>Composition of the learning set</b> | <b>6 reference sites<br/>(PARTY<sub>SOC</sub>v2.0,<br/>Grignon out)</b>    | <b>5 reference sites<br/>(PARTY<sub>SOC</sub>v2.0<sub>EU</sub>,<br/>Grignon out)</b>    | <b>4 reference sites<br/>(Ultuna, Versailles,<br/>Rothamsted, Askov)</b> | <b>3 reference sites<br/>(Ultuna, Versailles,<br/>Askov)</b> | <b>2 reference sites<br/>(Versailles, Askov)</b> |
| <b>R<sup>2</sup><sub>OOB</sub></b>     | 0.82                                                                       | 0.88                                                                                    | 0.79                                                                     | 0.86                                                         | 0.88                                             |
| <b>RMSEP<sub>OOB</sub></b>             | 0.09                                                                       | 0.07                                                                                    | 0.08                                                                     | 0.06                                                         | 0.06                                             |
| <b>R<sup>2</sup></b>                   | 0.56                                                                       | 0.44                                                                                    | 0.86                                                                     | 0.82                                                         | 0.87                                             |
| <b>RMSEP</b>                           | 0.11                                                                       | 0.18                                                                                    | 0.07                                                                     | 0.06                                                         | 0.07                                             |
| <b><sub>R</sub>RMSEP</b>               | 0.18                                                                       | 0.28                                                                                    | 0.11                                                                     | 0.10                                                         | 0.10                                             |
| <b>RPIQ</b>                            | 0.74                                                                       | 0.47                                                                                    | 1.22                                                                     | 1.36                                                         | 1.27                                             |
| <b>Bias</b>                            | 0.088                                                                      | 0.157                                                                                   | 0.003                                                                    | -0.035                                                       | -0.042                                           |
| <b>b</b>                               | <b>Versailles topsoil samples used as test set (n = 15)</b>                |                                                                                         |                                                                          |                                                              |                                                  |
| <b>Composition of the learning set</b> | <b>6 reference sites<br/>(PARTY<sub>SOC</sub>v2.0,<br/>Versailles out)</b> | <b>5 reference sites<br/>(PARTY<sub>SOC</sub>v2.0<sub>EU</sub>,<br/>Versailles out)</b> | <b>4 reference sites<br/>(Ultuna, Grignon,<br/>Askov, Rothamsted)</b>    | <b>3 reference sites<br/>(Ultuna, Grignon,<br/>Askov)</b>    | <b>2 reference sites<br/>(Ultuna, Grignon)</b>   |
| <b>R<sup>2</sup><sub>OOB</sub></b>     | 0.85                                                                       | 0.89                                                                                    | 0.83                                                                     | 0.89                                                         | 0.85                                             |
| <b>RMSEP<sub>OOB</sub></b>             | 0.08                                                                       | 0.07                                                                                    | 0.06                                                                     | 0.04                                                         | 0.05                                             |
| <b>R<sup>2</sup></b>                   | 0.48                                                                       | 0.66                                                                                    | 0.79                                                                     | 0.83                                                         | 0.79                                             |
| <b>RMSEP</b>                           | 0.17                                                                       | 0.14                                                                                    | 0.13                                                                     | 0.10                                                         | 0.11                                             |
| <b><sub>R</sub>RMSEP</b>               | 0.28                                                                       | 0.24                                                                                    | 0.23                                                                     | 0.17                                                         | 0.19                                             |
| <b>RPIQ</b>                            | 1.77                                                                       | 2.08                                                                                    | 2.20                                                                     | 2.90                                                         | 2.67                                             |
| <b>Bias</b>                            | 0.036                                                                      | 0.018                                                                                   | 0.052                                                                    | 0.006                                                        | 0.025                                            |

## Supplementary references

Barré, P., Eglin, T., Christensen, B. T., Ciais, P., Houot, S., Kätterer, T., van Oort, F., Peylin, P., Poulton, P. R., Romanenkov, V. and Chenu, C.: Quantifying and isolating stable soil organic carbon using long-term bare fallow experiments, *Biogeosciences*, 7(11), 3839–3850, <https://doi.org/10.5194/bg-7-3839-2010>, 2010.

Cécillon, L., Baudin, F., Chenu, C., Houot, S., Jolivet, R., Kätterer, T., Lutfalla, S., Macdonald, A., van Oort, F., Plante, A. F., Savignac, F., Soucémarianadin, L. N. and Barré, P.: A model based on Rock-Eval thermal analysis to quantify the size of the centennially persistent organic carbon pool in temperate soils, *Biogeosciences*, 15(9), 2835–2849, <https://doi.org/10.5194/bg-15-2835-2018>, 2018.

FAO: World reference base for soil resources 2014: international soil classification system for naming soils and creating legends for soil maps., FAO, Rome., 2014.

Franke, U. and Merbach, I.: Modelling soil organic matter dynamics on a bare fallow Chernozem soil in Central Germany, *Geoderma*, 303, 93–98, <https://doi.org/10.1016/j.geoderma.2017.05.013>, 2017.

Quezada, J. C., Etter, A., Ghazoul, J., Buttler, A. and Guillaume, T.: Carbon neutral expansion of oil palm plantations in the Neotropics, *Sci. Adv.*, 5(11), eaaw4418, <https://doi.org/10.1126/sciadv.aaw4418>, 2019.
