# Supplementary material for: Partitioning soil organic carbon into its centennially stable andactive fractions with statistical models based on Rock-Eval® thermalanalysis (PARTY SOC v2.0 and PARTY SOC v2.0 EU )
Source: Copernicus journal article supplement (doi:10.5194/gmd-2021-16), 2021-02-16
Supplement: Supplementary file 1 [file supplementary_table_S3.xlsx]

## Sheet: Feuil1
sample number	reference_site	experiment_name	plot_code (sample code for Rothamsted)	land_cover	treatment	sampling_year	laboratory_analysis_code	laboratory_job_re6	laboratory_re6_sample_bis	MinC	T10_HC_PYR	T30_HC_PYR	T50_HC_PYR	T70_HC_PYR	T90_HC_PYR	T10_CO_PYR	T30_CO_PYR	T50_CO_PYR	T70_CO_PYR	T90_CO_PYR	T10_CO2_PYR	T30_CO2_PYR	T50_CO2_PYR	T70_CO2_PYR	T90_CO2_PYR	T10_CO_OX	T30_CO_OX	T50_CO_OX	T70_CO_OX	T90_CO_OX	T10_CO2_OX	T30_CO2_OX	T50_CO2_OX	T70_CO2_OX	T90_CO2_OX	PseudoS1	PseudoS1/PC	PseudoS1/TOCre6	S2	S2/PC	HI	OIre6	HI/OIre6	PC	PC/TOCre6	TOCre6	I-index	R-index	TLHC-index
1	askov	Lermarken long-term bare fallow experiment	Z44	bare_fallow	mechanical bare fallow + NPK	1968	ASK16	2018-50	no	0.7	319	379	428	466	510	306	358	402	452	519	281	336	383	434	502	319	364	399	453	550	328	373	409	457	538	0.0490745	0.0163582	0.0047187	2.14925	0.716417	249	164.442	1.51422	3	0.288462	10.4	0.118464	0.61903	0.612748
2	askov	Lermarken long-term bare fallow experiment	Z44	bare_fallow	mechanical bare fallow + NPK	1976	ASK23	2018-50	no	0.6	322	385	432	467	509	304	354	400	453	521	278	332	381	434	502	317	361	394	444	544	329	374	410	457	538	0.0537835	0.0173495	0.00497995	2.24407	0.723893	250	155.184	1.61099	3.1	0.287037	10.8	0.082353	0.639345	0.599881
3	askov	Lermarken long-term bare fallow experiment	Z47	bare_fallow	mechanical bare fallow + NPK	1976	25Z47	2018-49	no	0.8	316	380	430	467	508	303	353	399	453	521	280	334	382	435	503	329	372	405	456	563	334	379	414	459	541	0.0611287	0.017979	0.00526971	2.39519	0.704466	249	160.02	1.55606	3.4	0.293103	11.6	0.110351	0.626894	0.604557
4	askov	Lermarken long-term bare fallow experiment	Z46	bare_fallow	mechanical bare fallow + NPK	1962	10Z46	2018-49	no	2.6	310	368	417	458	503	309	369	418	473	535	280	336	384	436	506	362	402	425	457	560	358	401	426	458	542	0.0606791	0.0173369	0.00466762	2.23626	0.638931	208	168.983	1.23089	3.5	0.269231	13	0.173202	0.572344	0.660312
5	askov	Lermarken long-term experiment on animal manure and mineral fertilizers	K41	cropland	four-course rotation	1962	ASK12	2018-50	no	0.9	310	370	420	461	506	305	357	402	453	520	278	333	379	430	500	323	368	400	449	552	331	376	410	456	537	0.0796207	0.0169406	0.00513682	3.44574	0.733137	268	156.468	1.71282	4.7	0.303226	15.5	0.171061	0.582659	0.642987
6	askov	Lermarken long-term experiment on animal manure and mineral fertilizers	K44	cropland	four-course rotation	1962	ASK13	2018-50	no	0.7	314	371	421	461	505	306	357	403	456	520	279	335	383	436	505	322	367	402	454	555	329	374	409	456	538	0.0567163	0.0166813	0.00484754	2.50779	0.737586	258	159.268	1.61991	3.4	0.290598	11.7	0.162393	0.585394	0.643472
7	askov	Lermarken long-term experiment on animal manure and mineral fertilizers	K41	cropland	four-course rotation	1976	ASK26	2018-50	no	0.7	313	372	422	461	505	303	354	400	453	521	277	330	377	429	499	314	360	395	466	576	329	374	409	456	537	0.0674792	0.0156928	0.00481994	3.20095	0.744407	276	152.972	1.80425	4.3	0.307143	14	0.150396	0.591479	0.639692
8	askov	Lermarken long-term experiment on animal manure and mineral fertilizers	K47	cropland	four-course rotation	1976	ASK28	2018-50	no	0.8	313	372	423	463	506	304	356	402	455	522	278	331	378	431	501	318	362	394	444	548	329	373	408	453	535	0.0651273	0.0155065	0.00465195	3.11918	0.742661	269	145.751	1.84561	4.2	0.3	14	0.164442	0.591786	0.632991
9	askov	Lermarken long-term bare fallow experiment	Z46	bare_fallow	mechanical bare fallow + NPK	1956	ASK3	2018-50	no	0.8	306	365	417	460	504	304	356	402	456	523	277	330	375	427	498	320	363	393	433	535	329	373	405	445	526	0.0803602	0.016072	0.00502251	3.77755	0.75551	284	147.805	1.92145	5	0.3125	16	0.207752	0.564625	0.652993
10	askov	Lermarken long-term bare fallow experiment	Z46	bare_fallow	mechanical bare fallow + NPK	1983	ASK31	2018-50	no	0.9	318	380	429	465	506	302	353	399	453	521	276	330	379	432	502	321	366	401	453	550	329	375	410	457	537	0.0607346	0.0189796	0.00537475	2.3588	0.737124	251	152.523	1.64565	3.2	0.283186	11.3	0.101727	0.623982	0.614486
11	askov	Lermarken long-term experiment on animal manure and mineral fertilizers	K41	cropland	four-course rotation	1983	ASK33	2018-50	no	0.9	315	374	423	462	505	302	353	398	453	522	276	329	375	428	499	316	361	395	453	563	326	372	408	456	537	0.0654238	0.0167753	0.00495635	2.84328	0.729046	260	160.9	1.61591	3.9	0.295455	13.2	0.155072	0.593393	0.635916
12	askov	Lermarken long-term experiment on animal manure and mineral fertilizers	K44	cropland	four-course rotation	1983	ASK34	2018-50	no	0.6	319	378	427	464	507	302	353	399	454	522	277	331	378	431	501	316	358	390	442	551	326	371	406	452	535	0.0610992	0.0179703	0.00545528	2.439	0.717352	262	163.128	1.6061	3.4	0.303571	11.2	0.118615	0.615122	0.620323
13	askov	Lermarken long-term bare fallow experiment	Z47	bare_fallow	mechanical bare fallow + NPK	1956	ASK4	2018-50	no	0.9	303	360	412	456	500	303	357	404	458	525	277	331	377	427	499	320	365	396	436	538	329	373	406	446	526	0.0811843	0.0169134	0.00534107	3.52435	0.734239	280	158.975	1.76129	4.8	0.315789	15.2	0.222479	0.546736	0.673224
14	askov	Lermarken long-term experiment on animal manure and mineral fertilizers	K44	cropland	four-course rotation	1956	ASK6	2018-50	no	0.6	312	372	422	462	506	305	355	400	452	521	278	332	379	431	500	318	363	395	446	554	329	373	407	453	535	0.0722758	0.0185323	0.00582869	2.90147	0.743966	282	152.33	1.85124	3.9	0.314516	12.4	0.160743	0.591053	0.636854
15	askov	Lermarken long-term bare fallow experiment	Z44	bare_fallow	mechanical bare fallow + NPK	1962	ASK9	2018-50	no	0.9	313	373	423	462	507	306	360	407	460	524	278	333	379	430	499	322	366	398	451	557	331	375	408	452	534	0.0563211	0.0152219	0.00440009	2.64484	0.714822	249	157.169	1.58428	3.7	0.289062	12.8	0.157422	0.593665	0.634958
16	bad_lauchstadt	Static fertilization experiment (V120)	v120/3;13	cropland	NPK	1980	bad_21	2016-37	no	1.6	309	380	429	472	535	314	367	414	468	529	287	350	403	457	519	318	364	397	456	539	333	375	410	458	532	0.181022	0.0696239	0.0119094	1.12615	0.433134	89	188.424	0.47234	2.6	0.171053	15.2	0.147953	0.622191	0.598902
17	bad_lauchstadt	Fallow experiment (V505a)	1a	bare_fallow	mechanical bare fallow	2001	Bad2.1	2019-36	no	1.8	338	398	443	483	546	314	367	417	471	531	295	358	412	465	524	315	355	391	451	531	325	372	415	475	540	0.064975	0.02825	0.00393788	1.03559	0.450257	76	160.277	0.474179	2.3	0.139394	16.5	0.050572	0.688954	0.537863
18	bad_lauchstadt	Fallow experiment (V505a)	1b	bare_fallow	mechanical bare fallow	2014	Bad2.10	2019-36	no	1.9	338	395	440	482	546	317	370	420	473	531	297	362	416	469	524	315	354	393	472	544	325	372	412	472	538	0.0546206	0.0260098	0.00356997	0.873418	0.415913	69	161.338	0.427674	2.1	0.137255	15.3	0.0712328	0.678019	0.549702
19	bad_lauchstadt	Fallow experiment (V505a)	1c	bare_fallow	mechanical bare fallow	2014	Bad2.11	2019-36	no	2.2	337	396	441	483	545	318	371	420	471	530	298	363	417	468	525	317	356	391	458	532	325	373	415	474	540	0.0613577	0.0266772	0.00383485	1.00496	0.436939	76	161.383	0.470929	2.3	0.14375	16	0.0674089	0.681215	0.54342
20	bad_lauchstadt	Fallow experiment (V505a)	1d	bare_fallow	mechanical bare fallow	2014	Bad2.12	2019-36	no	1.7	343	402	445	484	545	317	369	418	470	531	297	361	414	467	525	313	354	391	463	542	327	374	415	474	540	0.0528528	0.024024	0.00328278	0.992916	0.451325	75	157.208	0.477074	2.2	0.136646	16.1	0.0207747	0.704613	0.526174
21	bad_lauchstadt	Fallow experiment (V505a)	2a	bare_fallow	chemical bare fallow	2014	Bad2.13	2019-36	no	1.7	337	396	442	483	547	317	371	420	472	531	297	362	416	467	524	324	363	399	462	538	328	375	416	475	540	0.0579796	0.0263544	0.00362373	0.951184	0.432356	72	159.916	0.450238	2.2	0.1375	16	0.0707704	0.682729	0.5403
22	bad_lauchstadt	Fallow experiment (V505a)	2d	bare_fallow	chemical bare fallow	2014	Bad2.16	2019-36	no	1.7	335	395	440	480	540	316	369	418	472	531	296	360	414	466	524	312	352	389	460	540	324	372	413	473	540	0.0589633	0.0268015	0.00370838	0.961838	0.437199	73	159.36	0.458082	2.2	0.138365	15.9	0.05884	0.678031	0.553289
23	bad_lauchstadt	Fallow experiment (V505a)	1b	bare_fallow	mechanical bare fallow	2001	Bad2.2	2019-36	no	1.7	337	396	441	482	546	315	368	418	470	530	295	360	413	466	524	322	363	398	457	537	328	375	416	475	541	0.0585047	0.0254368	0.00365654	1.02275	0.444675	77	160.299	0.480353	2.3	0.14375	16	0.0677564	0.680206	0.543801
24	bad_lauchstadt	Fallow experiment (V505a)	1c	bare_fallow	mechanical bare fallow	2001	Bad2.3	2019-36	no	1.7	320	386	434	476	538	315	368	418	471	531	296	358	411	465	524	313	351	382	444	532	325	372	414	472	539	0.106826	0.0427303	0.00639675	1.17395	0.469581	85	159.653	0.532405	2.5	0.149701	16.7	0.122449	0.643437	0.577714
25	bad_lauchstadt	Fallow experiment (V505a)	1d	bare_fallow	mechanical bare fallow	2001	Bad2.4	2019-36	no	1.7	340	398	441	483	544	317	370	420	472	531	298	361	415	467	523	319	358	399	468	542	327	374	416	474	541	0.0530215	0.0230528	0.00319406	1.07043	0.465406	78	157.876	0.494059	2.3	0.138554	16.6	0.0463095	0.688954	0.543656
26	bad_lauchstadt	Fallow experiment (V505a)	2a	bare_fallow	chemical bare fallow	2001	Bad2.5	2019-36	no	1.9	337	397	441	481	544	315	369	418	472	531	296	359	413	466	524	318	360	399	463	539	327	375	416	475	542	0.0570099	0.0237541	0.00345515	1.08556	0.452317	79	157.714	0.500906	2.4	0.145455	16.5	0.0459396	0.686435	0.545026
27	bad_lauchstadt	Fallow experiment (V505a)	2b	bare_fallow	chemical bare fallow	2001	Bad2.6	2019-36	no	1.7	336	395	441	482	544	317	371	421	473	531	299	363	416	467	524	320	356	389	454	532	325	373	414	472	540	0.0566949	0.0246499	0.00347821	1.02248	0.444555	75	157.683	0.475638	2.3	0.141104	16.3	0.0748433	0.677747	0.546768
28	bad_lauchstadt	Fallow experiment (V505a)	2c	bare_fallow	chemical bare fallow	2001	Bad2.7	2019-36	no	2.1	335	393	439	482	543	317	372	423	472	530	299	365	419	468	522	327	366	405	475	542	326	374	415	473	542	0.0543667	0.0236377	0.00335597	0.985885	0.428646	73	163.6	0.446209	2.3	0.141975	16.2	0.0953173	0.668972	0.551049
29	bad_lauchstadt	Fallow experiment (V505a)	2d	bare_fallow	chemical bare fallow	2001	Bad2.8	2019-36	no	1.8	333	393	440	482	547	318	373	422	472	529	299	365	418	467	522	325	362	397	452	532	327	375	417	475	542	0.0643687	0.0257475	0.00365731	1.10071	0.440282	76	161.247	0.471327	2.5	0.142045	17.6	0.0950121	0.668612	0.549666
30	bad_lauchstadt	Fallow experiment (V505a)	1a	bare_fallow	mechanical bare fallow	2014	Bad2.9	2019-36	no	1.7	330	393	438	480	543	317	370	419	473	532	295	360	414	467	526	320	364	407	480	549	326	372	413	472	539	0.0767251	0.0348751	0.00485602	0.979931	0.445423	75	159.886	0.469085	2.2	0.139241	15.8	0.0787366	0.670085	0.556319
31	grignon	"36 parcelles" experiment	121	bare_fallow	mechanical and chemical bare fallow	1959	gri_1	2015-03	no	8.7	327	388	434	477	537	309	358	405	460	522	290	347	398	453	517	312	386	468	522	581	324	379	434	495	552	0.0835895	0.0309591	0.00638088	1.41677	0.524731	131	200.623	0.652965	2.7	0.206107	13.1	0.107994	0.648464	0.576289
32	grignon	"36 parcelles" experiment	151	bare_fallow	mechanical and chemical bare fallow	1962	gri_10	2015-03	no	10.7	323	385	433	476	534	310	359	405	460	522	293	349	399	453	517	313	383	464	515	565	325	381	437	497	552	0.0785355	0.0261785	0.00549199	1.68743	0.562476	143	180.156	0.793757	3	0.20979	14.3	0.121257	0.642725	0.580043
33	grignon	"36 parcelles" experiment	121	bare_fallow	mechanical and chemical bare fallow	1971	gri_13	2015-03	no	7.6	318	378	427	472	535	311	359	405	459	524	294	352	402	456	519	321	396	465	516	564	325	382	439	499	553	0.0783254	0.0340545	0.00718581	1.22266	0.531592	136	184.987	0.735187	2.3	0.211009	10.9	0.175182	0.610275	0.603785
34	grignon	"36 parcelles" experiment	151	bare_fallow	mechanical and chemical bare fallow	1971	gri_16	2015-03	no	11.9	333	393	441	483	540	312	360	406	459	522	297	353	403	457	519	322	390	460	515	568	325	382	439	499	555	0.0527985	0.0239993	0.00467243	1.1369	0.516772	121	192.052	0.630038	2.2	0.19469	11.3	0.0905931	0.673561	0.544498
35	grignon	"36 parcelles" experiment	121	bare_fallow	mechanical and chemical bare fallow	1980	gri_19	2015-03	no	7.3	332	390	437	481	545	314	360	406	460	525	296	353	403	457	519	321	389	458	511	558	324	381	439	500	555	0.052479	0.029155	0.00558287	0.854712	0.47484	110	202.805	0.542392	1.8	0.191489	9.4	0.107068	0.659417	0.561554
36	grignon	"36 parcelles" experiment	122	bare_fallow	mechanical and chemical bare fallow + straw	1980	gri_20	2016-37	no	8.1	324	388	434	478	540	311	359	403	457	522	291	346	395	450	515	310	370	447	510	565	322	376	433	495	552	0.131912	0.0507355	0.011179	1.18231	0.454736	121	246.019	0.491832	2.6	0.220339	11.8	0.116085	0.64869	0.573984
37	grignon	"36 parcelles" experiment	151	bare_fallow	mechanical and chemical bare fallow	1980	gri_22	2015-03	no	10.6	326	385	433	477	537	312	360	405	459	522	296	352	402	456	518	322	395	464	516	566	323	381	439	499	554	0.0574304	0.0273478	0.00536733	1.08112	0.514819	121	191.221	0.632776	2.1	0.196262	10.7	0.139341	0.637792	0.579384
38	grignon	"36 parcelles" experiment	152	bare_fallow	mechanical and chemical bare fallow + straw	1980	gri_23	2016-37	no	9.7	322	387	434	479	540	312	360	405	458	522	292	347	396	451	516	313	363	451	514	566	323	377	433	495	551	0.153935	0.0570129	0.012515	1.24039	0.459403	122	242.904	0.502256	2.7	0.219512	12.3	0.12257	0.647355	0.570292
39	grignon	"36 parcelles" experiment	121	bare_fallow	mechanical and chemical bare fallow	1989	gri_25	2015-03	no	7.2	330	388	434	478	542	312	360	406	460	524	295	350	400	453	517	313	375	446	504	556	319	374	431	492	550	0.0564495	0.0245433	0.00474366	1.18742	0.516268	120	182.909	0.656064	2.3	0.193277	11.9	0.108929	0.650588	0.574815
40	grignon	"36 parcelles" experiment	151	bare_fallow	mechanical and chemical bare fallow	1989	gri_28	2015-03	no	10.3	327	386	433	477	538	312	361	408	462	526	291	349	400	455	519	315	378	473	524	570	324	378	435	496	554	0.0845008	0.0352087	0.00692629	1.13367	0.472362	112	202.234	0.553815	2.4	0.196721	12.2	0.126593	0.640988	0.581514
41	grignon	"36 parcelles" experiment	121	bare_fallow	mechanical and chemical bare fallow	2007	gri_31	2015-03	no	6.4	321	380	428	476	539	315	360	406	460	525	300	357	407	460	521	329	406	475	522	565	326	386	446	505	558	0.0521039	0.0325649	0.00651298	0.807056	0.50441	121	189.714	0.637801	1.6	0.2	8	0.177145	0.617082	0.593818
42	grignon	"36 parcelles" experiment	151	bare_fallow	mechanical and chemical bare fallow	2007	gri_34	2015-03	no	10.4	327	386	433	479	542	315	361	407	460	524	298	356	407	460	521	328	413	487	539	643	329	386	447	508	561	0.050896	0.03181	0.00547269	0.813041	0.50815	105	178.286	0.588942	1.6	0.172043	9.3	0.147754	0.638514	0.573167
43	grignon	"36 parcelles" experiment	152	bare_fallow	mechanical and chemical bare fallow + straw	2007	gri_35	2016-37	no	8.6	318	385	434	479	542	311	359	404	458	522	291	346	395	450	515	311	374	452	513	569	323	377	435	497	553	0.157616	0.0606214	0.0133573	1.166	0.448463	119	239.715	0.496423	2.6	0.220339	11.8	0.139648	0.64094	0.573885
44	grignon	"36 parcelles" experiment	151	bare_fallow	mechanical and chemical bare fallow	1959	gri_4	2015-03	no	12.5	332	392	438	480	539	311	361	408	463	524	293	350	400	455	518	315	380	450	507	558	323	379	435	495	552	0.0592613	0.0219486	0.00432564	1.39068	0.515066	123	192.623	0.638552	2.7	0.19708	13.7	0.0789536	0.669086	0.558414
45	grignon	"36 parcelles" experiment	121	bare_fallow	mechanical and chemical bare fallow	1962	gri_7	2015-03	no	7	321	382	430	473	535	310	358	404	458	522	292	348	399	453	516	320	388	461	515	565	323	380	437	497	553	0.0761666	0.0292948	0.00614247	1.44208	0.554645	140	187.013	0.748611	2.6	0.209677	12.4	0.144644	0.625817	0.594258
46	rothamsted	Highfield long-term bare fallow experiment	S 7395	bare_fallow	mechanical and chemical bare fallow	1959	roth_1	2015-02	no	2.2	310	368	418	458	505	305	352	397	452	521	283	334	381	433	502	315	355	390	445	534	323	368	406	459	536	0.169826	0.0209661	0.0060009	5.38775	0.665155	229	193.403	1.18406	8.1	0.286219	28.3	0.172964	0.573283	0.659508
47	rothamsted	Highfield long-term bare fallow experiment	A 21640	bare_fallow	mechanical and chemical bare fallow	2000	roth_10	2015-02	no	1.2	302	370	416	456	513	299	346	391	452	524	279	337	386	436	503	328	382	443	518	579	328	377	417	478	551	0.118152	0.0421973	0.00968462	1.51579	0.541354	150	206.39	0.726781	2.8	0.229508	12.2	0.160772	0.57183	0.673677
48	rothamsted	Highfield adjacent long-term grassland	A 15741	grassland	permanent grassland	1972	roth_13	2015-02	no	3.1	309	365	415	457	504	305	353	399	455	526	285	334	379	432	502	310	352	389	465	564	322	367	405	458	537	0.170979	0.0181893	0.00495592	6.29073	0.669227	220	182.805	1.20347	9.4	0.272464	34.5	0.198827	0.559794	0.667386
49	rothamsted	Highfield adjacent long-term grassland	A 15741	grassland	permanent grassland	1972	roth_14	2015-02	no	2.3	307	361	410	454	502	303	351	396	452	521	282	331	377	428	498	316	358	392	449	546	322	367	403	454	533	0.167063	0.016875	0.00462777	6.72788	0.679583	225	176.416	1.2754	9.9	0.274238	36.1	0.233612	0.537777	0.682439
50	rothamsted	Highfield adjacent long-term grassland	A 20953	grassland	permanent grassland	1987	roth_15	2015-02	no	2.2	307	364	414	455	503	304	352	397	454	522	282	334	381	433	502	312	350	384	449	544	322	368	404	458	536	0.193792	0.0227991	0.0058725	5.49763	0.64678	201	180.364	1.11442	8.5	0.257576	33	0.193645	0.555424	0.67447
51	rothamsted	Highfield adjacent long-term grassland	A 20953	grassland	permanent grassland	1987	roth_16	2015-02	no	2.2	308	359	406	453	502	304	352	396	453	522	282	332	376	428	499	313	353	387	442	532	320	366	403	456	535	0.204158	0.0192602	0.00504093	7.19406	0.678685	214	170.026	1.25863	10.6	0.261728	40.5	0.260152	0.522538	0.689919
52	rothamsted	Highfield adjacent long-term grassland	A 21638	grassland	permanent grassland	2000	roth_17	2015-02	no	2.3	307	359	408	454	503	304	353	398	454	522	280	330	375	427	497	312	351	384	443	540	320	365	401	452	533	0.180795	0.0168967	0.0043989	7.23912	0.676554	212	170.182	1.24573	10.7	0.260341	41.1	0.250441	0.530702	0.684513
53	rothamsted	Highfield adjacent long-term grassland	A 21638	grassland	permanent grassland	2000	roth_18	2015-02	no	2.7	310	361	410	455	506	305	353	398	454	522	283	333	377	429	500	312	351	383	434	526	319	364	400	451	532	0.176762	0.0160693	0.00425932	7.4265	0.675137	216	172.052	1.25543	11	0.26506	41.5	0.250531	0.536384	0.67628
54	rothamsted	Highfield adjacent long-term grassland	A 21832	grassland	permanent grassland	2008	roth_19	2015-02	no	2.2	310	366	415	457	505	305	353	399	456	523	282	333	379	430	499	308	344	373	412	522	322	367	403	453	533	0.169764	0.0199723	0.00502261	5.53778	0.651504	197	174.39	1.12965	8.5	0.251479	33.8	0.197719	0.559992	0.66746
55	rothamsted	Highfield long-term bare fallow experiment	S 7395	bare_fallow	mechanical and chemical bare fallow	1959	roth_2	2015-02	no	2.1	310	367	418	459	506	305	353	399	454	522	284	334	380	432	501	314	354	390	451	538	322	367	406	459	537	0.149984	0.0180704	0.00493368	5.55149	0.668854	220	182.234	1.20724	8.3	0.273026	30.4	0.181449	0.572055	0.654674
56	rothamsted	Highfield long-term bare fallow experiment	S 7746	bare_fallow	mechanical and chemical bare fallow	1963	roth_3	2015-02	no	1.9	307	372	420	458	507	304	351	397	452	522	282	335	383	433	500	316	359	400	465	548	323	370	409	462	540	0.137662	0.0237348	0.00585794	3.62505	0.625009	186	190.39	0.976944	5.8	0.246809	23.5	0.140292	0.586476	0.658533
57	rothamsted	Highfield long-term bare fallow experiment	S 7746	bare_fallow	mechanical and chemical bare fallow	1963	roth_4	2015-02	no	1.7	310	374	422	461	511	304	352	398	453	522	283	335	382	433	501	311	360	401	471	550	324	370	408	460	538	0.123569	0.0220659	0.00537258	3.45511	0.616984	181	193.714	0.934366	5.6	0.243478	23	0.135016	0.596995	0.644216
58	rothamsted	Highfield long-term bare fallow experiment	A 19433	bare_fallow	mechanical and chemical bare fallow	1971	roth_5	2015-02	no	1.5	304	372	419	458	509	304	351	396	452	522	281	337	385	435	501	314	364	407	476	547	324	371	410	468	542	0.12546	0.0298715	0.00746788	2.55336	0.607943	183	198.961	0.919778	4.2	0.25	16.8	0.131364	0.587279	0.662083
59	rothamsted	Highfield long-term bare fallow experiment	A 19433	bare_fallow	mechanical and chemical bare fallow	1971	roth_6	2015-02	no	1.9	304	371	419	458	511	301	350	397	453	524	281	336	384	434	502	314	363	402	464	544	325	370	407	458	537	0.121293	0.0303232	0.00705192	2.24841	0.562103	158	208.519	0.757723	4	0.232558	17.2	0.13554	0.587389	0.659904
60	rothamsted	Highfield long-term bare fallow experiment	A 20955	bare_fallow	mechanical and chemical bare fallow	1987	roth_7	2015-02	yes	1.3	296	365	412	452	508	302	347	392	451	522	280	339	388	438	505	316	369	419	493	561	325	373	415	473	546	0.20772	0.0629453	0.0157363	1.84437	0.558899	169	209.61	0.806258	3.3	0.25	13.2	0.175489	0.555046	0.692158
61	ultuna	Continuous soil organic matter field experiment	54	cropland	Straw + N + PK	1967	ult_10	2015-30	no	1.2	294	357	408	456	520	308	357	403	458	524	284	337	384	437	508	311	359	398	462	533	321	368	405	457	528	0.206212	0.0490982	0.0125739	2.48107	0.590732	182	190.909	0.953333	4.2	0.256098	16.4	0.268428	0.532773	0.677266
62	ultuna	Continuous soil organic matter field experiment	55	bare_fallow	Manual weeding + PK	1967	ult_11	2015-02	no	1.2	294	358	411	460	533	305	354	401	457	525	285	339	387	441	511	313	364	416	477	545	328	372	413	468	537	0.226203	0.0837791	0.0180963	1.37211	0.508189	133	190.442	0.698377	2.7	0.216	12.5	0.272774	0.542539	0.659954
63	ultuna	Continuous soil organic matter field experiment	54	cropland	Straw + N + PK	1974	ult_16	2015-30	no	1.3	290	351	403	452	521	306	356	402	457	524	282	336	381	435	508	316	363	404	460	538	320	366	404	453	524	0.401197	0.0872168	0.0227953	2.63016	0.571775	181	193.662	0.934616	4.6	0.261364	17.6	0.309715	0.507886	0.692282
64	ultuna	Continuous soil organic matter field experiment	55	bare_fallow	Manual weeding + PK	1974	ult_17	2015-02	no	1	294	358	412	462	532	306	356	402	458	525	287	342	389	442	512	314	364	410	477	551	326	371	412	466	533	0.172046	0.061445	0.0133369	1.56189	0.557817	147	175.377	0.838196	2.8	0.217054	12.9	0.274979	0.54538	0.65548
65	ultuna	Continuous soil organic matter field experiment	39	cropland	Straw + N + PK	1985	ult_19	2015-03	no	1.4	306	366	415	460	525	308	357	402	457	524	285	338	383	436	508	315	363	404	466	542	325	369	407	460	530	0.145353	0.0382508	0.00830589	2.1709	0.57129	150	184.623	0.812465	3.8	0.217143	17.5	0.227435	0.559704	0.655518
66	ultuna	Continuous soil organic matter field experiment	54	cropland	Straw + N + PK	1985	ult_22	2015-30	no	1.2	300	361	411	457	521	305	356	403	459	524	280	334	380	435	508	314	361	399	458	537	320	366	402	451	523	0.178234	0.0434717	0.0108021	2.38487	0.581676	175	197.974	0.883954	4.1	0.248485	16.5	0.242586	0.545917	0.66857
67	ultuna	Continuous soil organic matter field experiment	39	cropland	Straw + N + PK	1995	ult_25	2015-03	no	1.3	305	364	411	458	522	309	358	400	455	522	286	337	380	432	506	315	362	400	468	547	326	369	405	455	526	0.156427	0.0363783	0.00841003	2.55342	0.593818	166	178.805	0.928385	4.3	0.231183	18.6	0.257927	0.542962	0.66707
68	ultuna	Continuous soil organic matter field experiment	41	cropland	Calcium nitrate + PK	1995	ult_26	2015-30	no	1.3	299	360	412	460	530	307	356	403	459	524	284	339	386	443	515	316	364	408	470	540	320	367	407	460	530	0.160894	0.0473217	0.0115751	1.96309	0.577379	171	194.545	0.878972	3.4	0.244604	13.9	0.255875	0.547451	0.662343
69	ultuna	Continuous soil organic matter field experiment	44	bare_fallow	Manual weeding + PK (glyphosate in 1991)	1995	ult_27	2015-03	no	1	302	364	415	462	532	302	352	399	458	526	282	339	387	443	512	324	370	413	473	545	331	375	414	464	534	0.0767646	0.0404024	0.00767646	0.887539	0.467126	107	196.104	0.545629	1.9	0.19	10	0.244567	0.558067	0.649983
70	ultuna	Continuous soil organic matter field experiment	54	cropland	Straw + N + PK	1995	ult_28	2015-30	no	1.9	297	356	408	456	519	308	357	403	458	524	282	334	378	431	505	317	355	389	451	536	318	363	398	448	523	0.278648	0.0516014	0.0137265	3.30987	0.61294	197	185.195	1.06374	5.4	0.26601	20.3	0.281633	0.528072	0.676805
71	ultuna	Continuous soil organic matter field experiment	41	cropland	Calcium nitrate + PK	2009	ult_32	2015-30	no	1.1	291	354	406	454	521	304	354	402	459	526	282	337	385	441	513	314	364	414	482	564	319	366	408	462	532	0.193536	0.0667366	0.0152391	1.54141	0.531521	146	200.052	0.72981	2.9	0.228346	12.7	0.282663	0.523393	0.685163
72	ultuna	Continuous soil organic matter field experiment	57	cropland	Calcium nitrate + PK	2009	ult_36	2015-30	no	1.5	297	360	411	458	524	309	359	406	463	528	284	341	390	448	519	317	358	401	466	535	319	366	406	460	530	0.181231	0.0566346	0.0133258	1.697	0.530311	151	200.052	0.754804	3.2	0.235294	13.6	0.246135	0.546033	0.667974
73	ultuna	Continuous soil organic matter field experiment	54	cropland	Straw + N + PK	1956	ult_4	2015-04	no	1.4	308	369	418	462	525	309	361	407	466	529	286	338	383	435	508	314	355	393	458	536	320	367	405	457	527	0.144283	0.0424361	0.00924889	1.84907	0.543845	143	183.844	0.777833	3.4	0.217949	15.6	0.20862	0.571574	0.646728
74	ultuna	Continuous soil organic matter field experiment	39	cropland	Straw + N + PK	1967	ult_7	2015-03	no	1.4	302	364	414	461	526	307	357	403	458	525	287	339	385	438	510	316	364	407	468	545	325	370	410	459	530	0.155482	0.0444233	0.00942313	1.92075	0.548785	141	180.571	0.780854	3.5	0.212121	16.5	0.238792	0.556452	0.656527
75	ultuna	Continuous soil organic matter field experiment	44	bare_fallow	Manual weeding + PK	1967	ult_9	2015-02	no	1.1	288	351	406	456	524	304	354	401	457	524	283	338	385	439	510	318	364	405	464	535	330	374	414	467	536	0.236316	0.0787721	0.0181782	1.59595	0.531983	148	182.909	0.809145	3	0.230769	13	0.300648	0.521178	0.678947
76	versailles	"42 parcelles" experiment	11	bare_fallow	mechanical and chemical bare fallow	1929	vers_1929_11	2015-02	no	2.1	320	386	433	466	515	306	357	404	459	524	284	334	378	431	504	315	370	446	534	670	322	370	413	469	542	0.115259	0.025613	0.00643903	2.70198	0.600439	182	194.078	0.937768	4.5	0.251397	17.9	0.0568511	0.643803	0.600517
77	versailles	"42 parcelles" experiment	32	bare_fallow	mechanical and chemical bare fallow	1929	vers_1929_32	2015-02	no	1.5	313	374	424	466	521	305	357	403	456	521	282	335	379	431	503	327	377	435	511	592	326	373	415	471	547	0.143665	0.0342059	0.00855147	2.45239	0.583902	176	204.935	0.858809	4.2	0.25	16.8	0.176507	0.596892	0.623208
78	versailles	"42 parcelles" experiment	32	bare_fallow	mechanical and chemical bare fallow	1934	vers_1934_32	2015-02	no	1.6	310	377	427	468	522	305	356	402	456	522	281	333	377	430	502	332	388	460	538	669	325	373	417	474	548	0.0886434	0.0260716	0.00594922	1.95504	0.575012	158	192.052	0.822694	3.4	0.228188	14.9	0.165484	0.608709	0.609876
79	versailles	"42 parcelles" experiment	11	bare_fallow	mechanical and chemical bare fallow	1939	vers_1939_11	2015-02	no	1.4	313	379	429	470	531	305	357	402	456	522	283	335	381	431	502	334	392	469	541	662	328	377	422	479	551	0.0600208	0.021436	0.00451284	1.4873	0.531178	135	190.13	0.710041	2.8	0.210526	13.3	0.147697	0.618051	0.602563
80	versailles	"42 parcelles" experiment	32	bare_fallow	mechanical and chemical bare fallow	1939	vers_1939_32	2015-02	no	1.3	305	375	426	468	529	306	357	403	456	521	282	335	381	431	501	335	390	456	526	612	329	377	420	476	547	0.11404	0.0407287	0.00927158	1.60879	0.574568	158	192.727	0.819811	2.8	0.227642	12.3	0.172965	0.605438	0.610983
81	versailles	"42 parcelles" experiment	32	bare_fallow	mechanical and chemical bare fallow	1950	vers_1950_32	2015-02	no	1.9	301	369	422	467	530	302	354	402	457	524	279	334	381	434	505	341	407	476	538	689	332	381	427	484	551	0.0938271	0.0446796	0.00938271	1.09909	0.523378	133	202.753	0.65597	2.1	0.21	10	0.216497	0.584271	0.623594
82	versailles	"42 parcelles" experiment	11	bare_fallow	mechanical and chemical bare fallow	1960	vers_1960_11	2015-02	no	1.3	296	363	417	464	533	304	356	404	460	525	278	335	385	439	508	353	438	519	574	646	337	390	440	501	568	0.105123	0.0525617	0.0102062	1.03765	0.518827	121	180.779	0.669325	2	0.194175	10.3	0.239096	0.566281	0.641387
83	versailles	"42 parcelles" experiment	32	bare_fallow	mechanical and chemical bare fallow	1960	vers_1960_32	2015-02	no	0.8	302	368	419	466	535	303	354	402	458	525	279	335	384	436	506	351	431	507	569	739	334	384	431	486	551	0.0742613	0.0436831	0.00916806	0.812438	0.477905	121	205.247	0.589534	1.7	0.209877	8.1	0.224928	0.57755	0.631418
84	versailles	"42 parcelles" experiment	11	bare_fallow	mechanical and chemical bare fallow	1968	vers_1968_11	2015-02	no	2.9	292	358	413	463	535	304	356	405	461	527	282	338	387	440	508	370	484	566	665	776	339	391	441	500	566	0.12605	0.0700278	0.0128622	0.888111	0.493395	109	159.013	0.685479	1.8	0.183673	9.8	0.276021	0.548017	0.649575
85	versailles	"42 parcelles" experiment	32	bare_fallow	mechanical and chemical bare fallow	1968	vers_1968_32	2015-02	no	1.7	290	355	410	460	528	301	352	400	456	524	279	335	385	438	507	360	450	533	622	757	337	390	438	494	560	0.0840057	0.0525036	0.0101212	0.818899	0.511812	119	183.221	0.64949	1.6	0.192771	8.3	0.285819	0.538204	0.660876
86	versailles	"42 parcelles" experiment	11	bare_fallow	mechanical and chemical bare fallow	1980	vers_1980_11	2015-02	no	2.8	291	356	410	462	537	300	352	400	458	526	279	337	387	440	509	380	495	578	671	765	342	396	445	501	565	0.0878655	0.0627611	0.0107153	0.664376	0.474554	98	170.857	0.573579	1.4	0.170732	8.2	0.301459	0.536555	0.655554
87	versailles	"42 parcelles" experiment	32	bare_fallow	mechanical and chemical bare fallow	1980	vers_1980_32	2015-02	no	1.4	286	352	406	458	532	301	352	398	455	524	278	337	387	440	509	369	463	536	600	758	340	393	444	501	564	0.0849172	0.0606551	0.0119602	0.696097	0.497212	118	189.247	0.623525	1.4	0.197183	7.1	0.312295	0.523714	0.670835
88	versailles	"42 parcelles" experiment	32	bare_fallow	mechanical and chemical bare fallow	1991	vers_1991_32	2015-03	no	1.8	280	346	402	455	528	298	349	397	458	526	280	338	387	441	510	372	471	543	605	741	342	397	449	506	567	0.158876	0.113483	0.0230256	0.702373	0.501695	123	169.247	0.72675	1.4	0.202899	6.9	0.337442	0.504425	0.684325
89	versailles	"42 parcelles" experiment	32	bare_fallow	mechanical and chemical bare fallow	2002	vers_2002_32	2015-02	no	1.4	282	345	400	454	534	299	349	399	458	526	281	340	391	445	512	383	486	551	622	747	343	401	455	509	568	0.071068	0.0592233	0.0112806	0.644313	0.536927	124	158.13	0.784166	1.2	0.190476	6.3	0.359587	0.497942	0.687169
90	versailles	"42 parcelles" experiment	32	bare_fallow	mechanical and chemical bare fallow	2008	vers_2008_32	2015-02	no	1	295	367	419	450	521	300	353	405	467	530	279	340	391	447	517	378	456	524	586	769	348	405	453	505	563	0.0550924	0.050084	0.00983793	0.580224	0.527477	125	176.883	0.706681	1.1	0.196429	5.6	0.0892517	0.582548	0.70703
91	la_cabana	Oil palm plantation chronosequence	13C	oil_palm_plantation	oil palm plantation (stand age = 18 y)	2017	X13C	2019-36	no	1.8	291	363	419	461	510	306	358	410	467	528	292	351	407	460	518	315	353	382	418	501	333	378	411	454	526	0.131116	0.0319795	0.0067239	2.20859	0.538681	136	192.125	0.707872	4.1	0.210256	19.5	0.191676	0.57485	0.647304
92	la_cabana	Oil palm plantation chronosequence	17C	oil_palm_plantation	oil palm plantation (stand age = 18 y)	2017	X17C	2019-36	no	1.7	294	366	420	462	511	303	356	410	468	528	291	350	406	460	519	311	350	388	445	530	337	382	417	469	538	0.122212	0.0339478	0.00690463	1.90229	0.528415	129	193.732	0.66587	3.6	0.20339	17.7	0.182125	0.582196	0.644012
93	la_cabana	Oil palm plantation chronosequence	21B	oil_palm_plantation	oil palm plantation (stand age = 56 y)	2017	X21Bbis	2019-36	yes	2.2	304	375	424	466	525	297	348	397	460	527	284	346	397	449	515	308	346	375	417	504	326	369	401	442	518	0.175566	0.0438914	0.00938854	1.88943	0.472357	122	227.447	0.536389	4	0.213904	18.7	0.157459	0.601824	0.626913
94	la_cabana	Oil palm plantation chronosequence	21C	oil_palm_plantation	oil palm plantation (stand age = 30 y)	2017	X21C	2019-36	no	1.2	293	356	407	455	510	307	361	414	468	528	295	356	413	461	512	318	356	389	448	532	327	373	408	458	530	0.0833532	0.0362405	0.00801473	1.18857	0.516768	138	210.47	0.655677	2.3	0.221154	10.4	0.277151	0.526852	0.68071
95	la_cabana	Oil palm plantation chronosequence	29C	oil_palm_plantation	oil palm plantation (stand age = 32 y)	2017	X29C	2019-36	no	1.5	295	354	401	452	506	311	369	422	473	532	294	354	409	457	510	329	381	435	508	616	330	373	404	446	521	0.0986835	0.0318334	0.00690094	1.6885	0.544679	143	188.579	0.758301	3.1	0.216783	14.3	0.31927	0.503682	0.692363
96	la_cabana	Oil palm plantation chronosequence	41C	oil_palm_plantation	oil palm plantation (stand age = 45 y)	2017	X41C	2019-36	no	1.2	302	374	424	465	521	299	352	403	464	529	285	345	395	447	512	319	354	380	412	492	326	369	399	437	519	0.0964559	0.0419374	0.0089311	1.18041	0.513222	131	212.772	0.615684	2.3	0.212963	10.8	0.162389	0.598503	0.627096
97	la_cabana	Oil palm plantation chronosequence	45C	oil_palm_plantation	oil palm plantation (stand age = 45 y)	2017	X45C	2019-36	no	1.2	300	368	419	463	522	299	353	403	463	528	287	348	400	451	512	324	363	392	435	528	325	370	400	440	523	0.0904668	0.0411213	0.0088693	1.05816	0.480984	125	222.429	0.561976	2.2	0.215686	10.2	0.203316	0.575642	0.64363
98	la_cabana	Oil palm plantation chronosequence	49C	oil_palm_plantation	oil palm plantation (stand age = 56 y)	2017	X49C	2019-36	no	2.1	302	372	422	464	522	295	348	397	460	527	283	343	395	446	511	321	359	388	424	502	328	372	403	442	520	0.172437	0.0410564	0.00884291	2.07969	0.495165	129	217.276	0.593715	4.2	0.215385	19.5	0.180099	0.590253	0.634299
99	la_cabana	Oil palm plantation chronosequence	53C	oil_palm_plantation	oil palm plantation (stand age = 56 y)	2017	X53Cbis	2019-36	yes	2	308	382	429	469	528	299	353	404	467	531	286	348	400	451	515	316	354	384	419	477	330	375	408	442	511	0.136756	0.0427361	0.00804444	1.50553	0.470477	107	197.519	0.541721	3.2	0.188235	17	0.123418	0.626192	0.607063
100	la_cabana	Oil palm plantation chronosequence	5B	oil_palm_plantation	oil palm plantation (stand age = 18 y)	2017	X5B	2019-36	no	2.1	291	361	416	460	513	305	359	413	467	527	293	352	410	462	517	327	368	399	442	518	333	380	414	461	532	0.133449	0.0317736	0.0065097	2.17443	0.517722	128	197.57	0.647872	4.2	0.204878	20.5	0.221865	0.561774	0.652338
101	la_cabana	Oil palm plantation chronosequence	9B	oil_palm_plantation	oil palm plantation (stand age = 30 y)	2017	X9B	2019-36	no	1.4	301	375	426	463	508	305	358	410	467	530	290	347	402	455	517	314	352	380	419	512	330	374	407	455	529	0.0899576	0.0310199	0.00686699	1.55983	0.537872	144	196.497	0.732836	2.9	0.221374	13.1	0.131303	0.606998	0.628689
102	la_cabana	Oil palm plantation chronosequence	9C	oil_palm_plantation	oil palm plantation (stand age = 12 y)	2017	X9C	2019-36	no	2	291	363	418	460	510	301	352	405	465	527	290	348	405	460	520	314	353	386	443	535	333	379	417	475	543	0.162116	0.038599	0.00885878	2.27881	0.542574	150	209.214	0.71697	4.2	0.229508	18.3	0.191673	0.572675	0.653993
103	la_cabana	Adjacent cattle ranching farm	PAST1.1B	grassland	Brachiaria pasture	2017	PAST1.1B	2019-39	no	2.1	279	330	389	446	495	306	358	409	464	526	287	340	392	446	509	325	366	399	457	542	333	375	406	446	519	0.507672	0.05769	0.0159645	5.84633	0.664356	222	160.174	1.38599	8.8	0.27673	31.8	0.366525	0.465532	0.720128
104	la_cabana	Adjacent cattle ranching farm	PAST2.1C	grassland	Brachiaria pasture	2017	PAST2.1C	2019-39	no	2.3	284	343	400	448	496	306	361	415	477	539	292	348	403	457	519	305	341	366	404	515	325	369	402	441	517	0.276875	0.0522405	0.0123605	2.97658	0.56162	160	187.665	0.852583	5.3	0.236607	22.4	0.290524	0.498009	0.711361
105	la_cabana	Adjacent cattle ranching farm	PAST3.5C	grassland	Brachiaria pasture	2017	PAST3.5Cbis	2019-39	yes	2.3	285	351	409	452	497	304	353	405	462	526	293	348	406	458	517	299	331	374	438	535	325	374	413	465	533	0.235008	0.0419656	0.0104914	3.40395	0.607849	183	189.348	0.966475	5.6	0.25	22.4	0.219856	0.534362	0.694142
